# Supplementary material for: Options for the diagnosis of high blood pressure in primary care: a systematic review and economic model
Source: Springer Nature journal article supplement (doi:10.1038/s41371-020-0357-x), 2020-05-28
Supplement: 41371_2020_357_MOESM2_ESM.pdf [file 41371_2020_357_MOESM2_ESM.pdf]

**Figure A: Cost effectiveness planes for all subgroups**

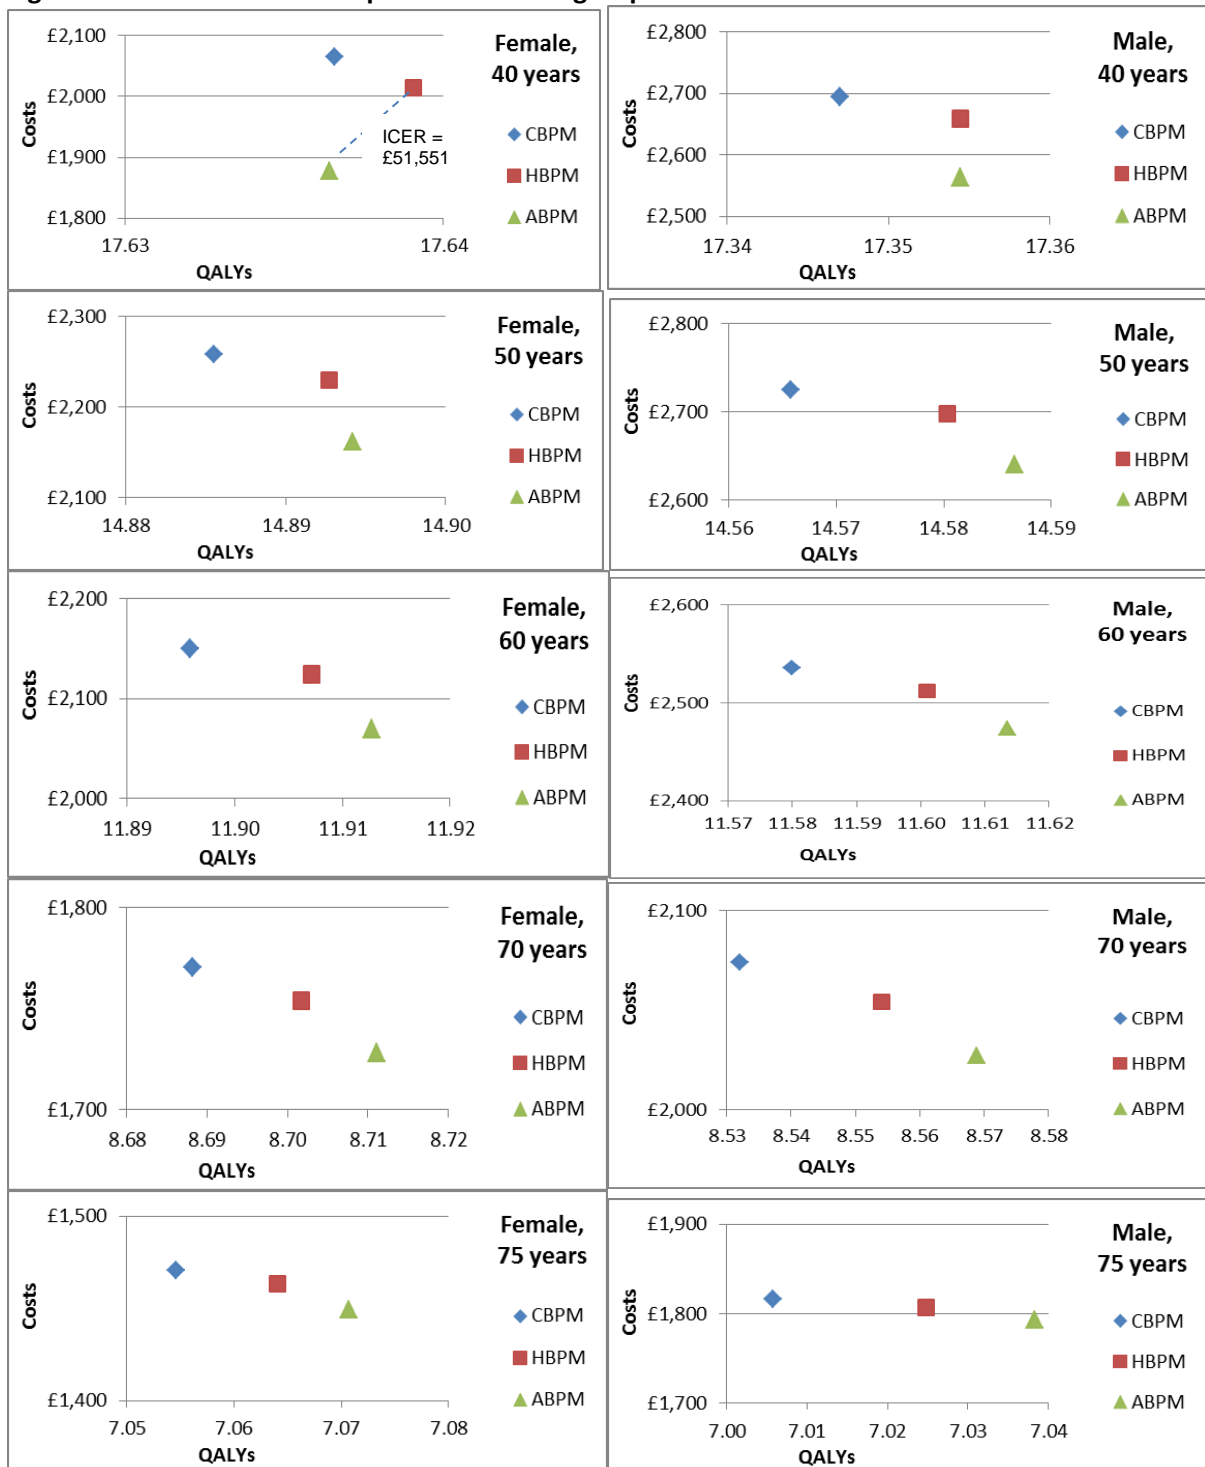

ABPM = Ambulatory BP, CBPM = Clinic BP, HBPM = Home BP, ICER=incremental cost-effectiveness ratio; QALYs=quality-adjusted life years. Where a line is shown, this represents the cost-effectiveness frontier and the ICER displayed is for HBPM compared to the lower cost intervention (ABPM) because CBPM is dominated by HBPM. In all other scenarios, ABPM dominates (higher QALYs and lower costs).
